# Supplementary material for: Influence of intermolecular interactions and crystal structure on desolvation mechanisms of solvates
Source: Royal Society of Chemistry journal article supplement (doi:10.1039/d1ce00284h), 2021-01-01
Supplement: d1ce00284h1.pdf [file d1ce00284h1.pdf]

## Supporting Information for

# Influence of intermolecular interactions and crystal structure on desolvation mechanisms of solvates

Wanying Liu,<sup>a</sup> Baohong Hou,<sup>ab</sup> Xin Huang,<sup>\*ab</sup> Shuyi Zong,<sup>a</sup> Zhixin Zheng,<sup>a</sup> Shuyu Li,<sup>a</sup> Bugui Zhao,<sup>d</sup> Songqiang Liu,<sup>d</sup> Lina Zhou,<sup>ab</sup> and Hongxun Hao<sup>\*abc</sup>

<sup>a</sup> National Engineering Research Center of Industrial Crystallization Technology, School of Chemical Engineering and Technology, Tianjin University, Tianjin 300072, China.

<sup>b</sup> Collaborative Innovation Center of Chemical Science and Engineering (Tianjin), Tianjin 300072, China

<sup>c</sup> School of Chemical Engineering and Technology, Hainan University, Haikou 570208, China.

<sup>d</sup> Shandong Lukang Pharmaceutical Group Co., Ltd, Shandong 272021, China.

Table S1. Properties of the Solvents used.

| solvent      | Chemical structures                                                                 | $\alpha$ | $\beta$ | $\pi^*$ | Results |
|--------------|-------------------------------------------------------------------------------------|----------|---------|---------|---------|
| Acetonitrile |  | 0.07     | 0.32    | 0.75    | S1      |
| Acetone      |  | 0.04     | 0.49    | 0.71    | S2      |
| n-propanol   |  | 0.37     | 0.48    | 0.52    | S3      |
| isopropanol  |  | 0.33     | 0.56    | 0.48    | S4      |

Table S2. 2-theta of characteristic peaks of various crystal forms

| Crystal Forms | 2θ of characteristic peaks                                               |
|---------------|--------------------------------------------------------------------------|
| Solvate S1    | 6.2, 7.0, 8.0, 10.7, 11.8, 12.6, 14.1, 18.5, 19.0, 21.3, 21.7, 22.2±0.2° |
| Solvate S2    | 7.0, 8.1, 8.9, 10.4, 12.0, 14.1, 19.3, 21.4, 21.6, 22.0, 23.6±0.2°       |
| Solvate S3    | 7.4, 8.3, 9.1, 10.6, 12.9, 14.5, 14.7, 15.1, 16.9, 21.7, 22.2, 22.5±0.2° |
| Solvate S4    | 6.5, 8.2, 11.4, 12.1, 13.5, 13.7, 21.8, 22.6, 27.0±0.2°                  |
| Solvate III   | 6.9, 7.7, 10.8, 13.6, 14.1, 16.9, 19.8, 20.5, 22.9, 23.9±0.2°            |
| Form I        | 7.6, 8.1, 10.5, 14.8, 17.3, 18.4, 18.6, 20.7, 23.3, 23.5±0.2°            |
| Form II       | 7.4, 7.9, 12.0, 12.7, 16.9, 17.3, 19.9, 20.9, 21.4, 22.6, 23.3±0.2°      |

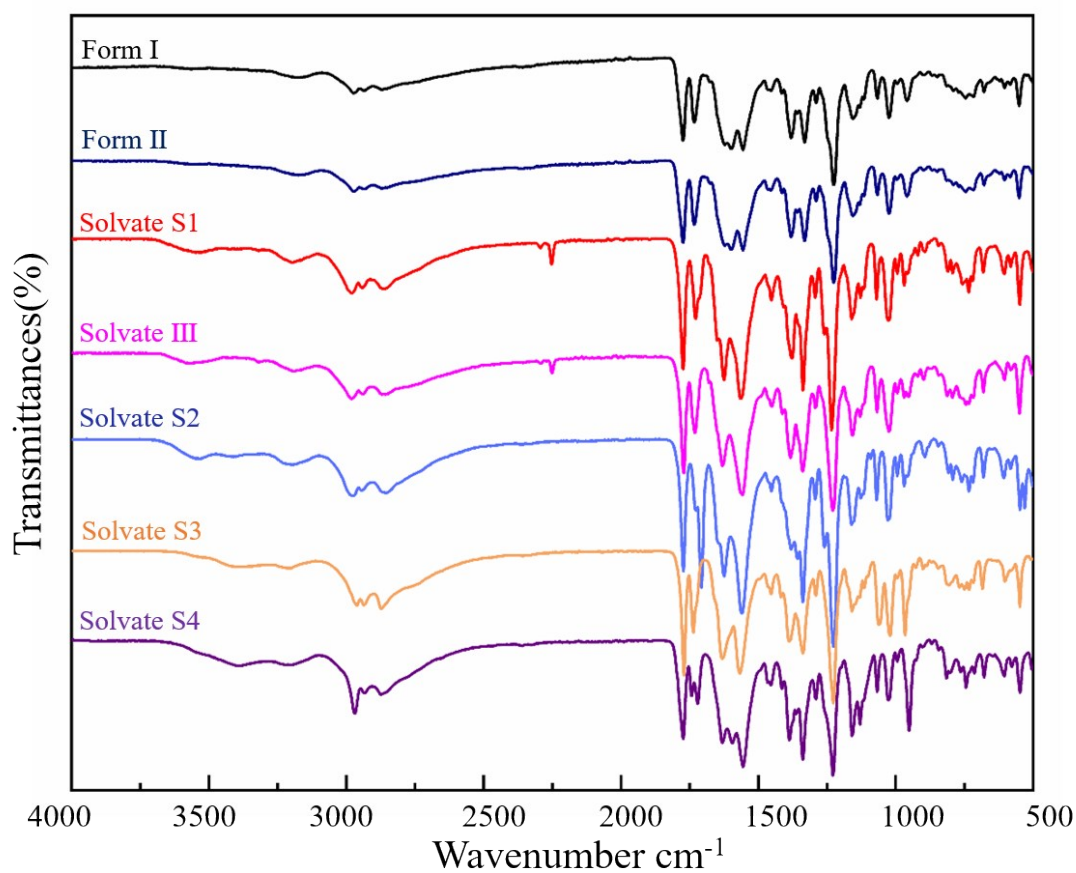

Fig. S1 FTIR spectra of various crystal forms of cefathiamidine.

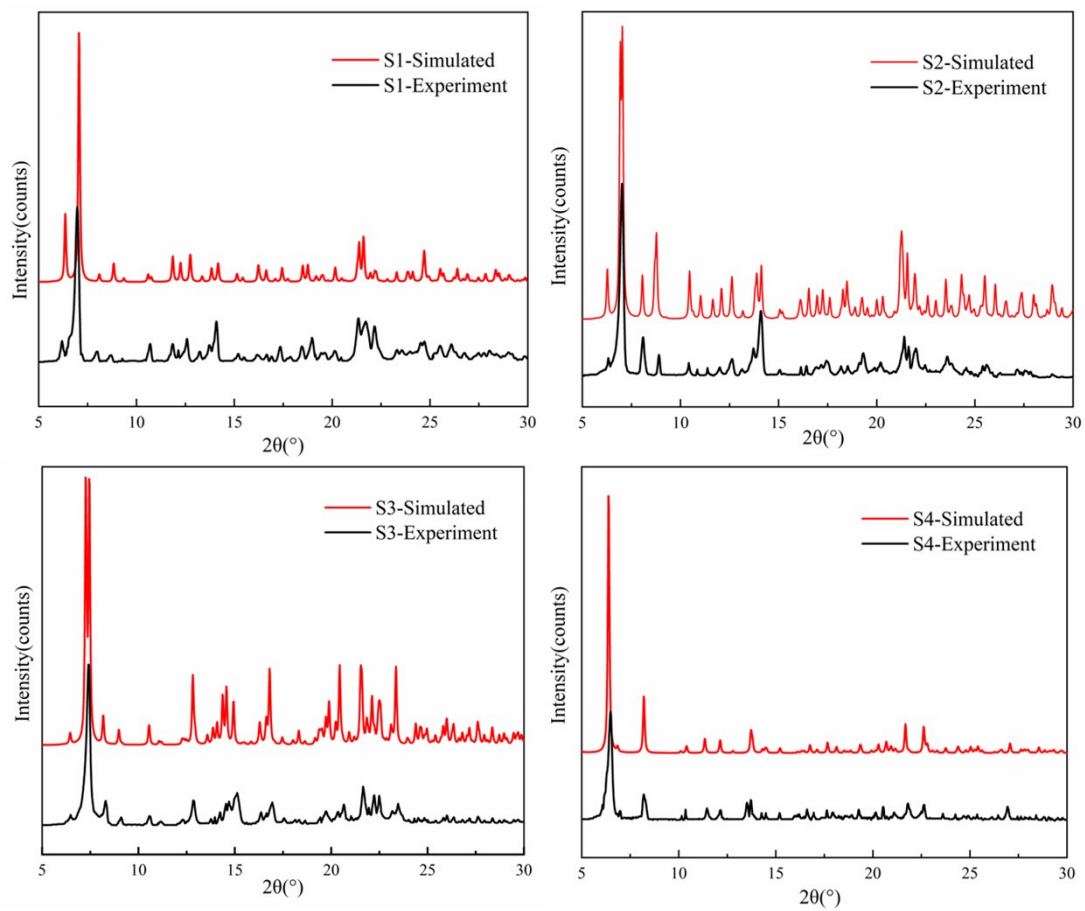

Fig. S2 The simulated and experimented PXRD of Solvate S1, S2, S3 and S4.

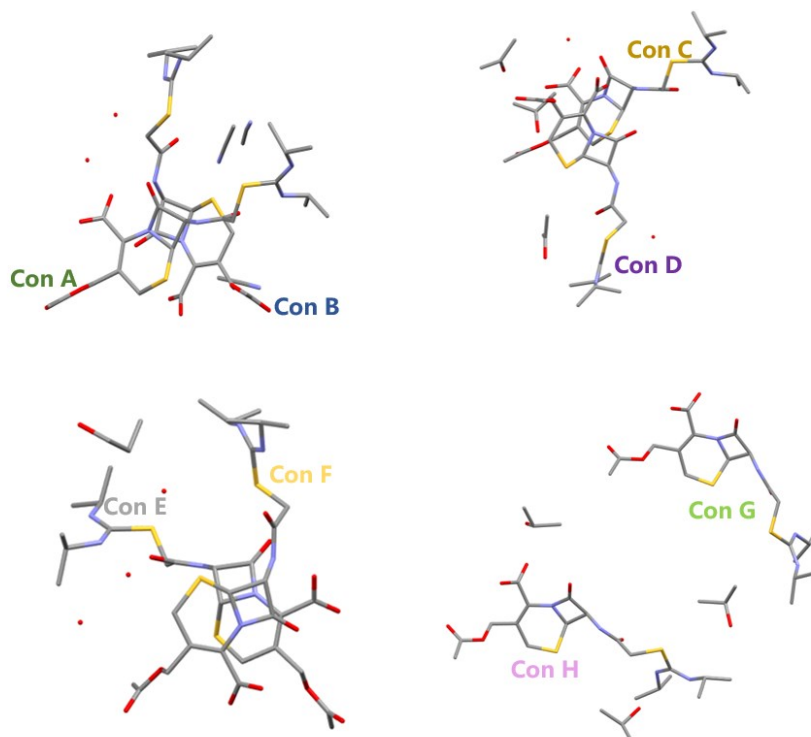

Fig. S3 Asymmetric units of Solvate S1(a), Solvate S2(b), Solvate S3(c) and Solvate S4(d). The H atoms are omitted for clarity.

Table S3. Hydrogen bonds data of different cefathiamidine solvates

| Solvate   | D-H...A        | D-H (Å) | H...A (Å) | D...A (Å) | $\theta(\text{DHA})$ (°) | Symop for A        |
|-----------|----------------|---------|-----------|-----------|--------------------------|--------------------|
| <b>S1</b> | N1-H1...O1     | 0.88    | 1.90      | 2.742(4)  | 161                      |                    |
|           | N5-H5A...O7    | 0.88    | 2.27      | 2.929(4)  | 132                      |                    |
|           | N7-H7...O3     | 0.88    | 1.94      | 2.758(4)  | 153                      |                    |
|           | N3-H3...O9     | 0.88    | 1.87      | 2.720(4)  | 163                      | 1-x, -1/2+y, 1.5-z |
|           | N2-H2...O4     | 0.88    | 1.92      | 2.778(4)  | 166                      |                    |
|           | N6-H6...O10    | 0.88    | 2.10      | 2.931(4)  | 157                      | -1+x, y, z         |
|           | O14-H14B...O13 | 0.87    | 1.82      | 2.682(6)  | 169                      | -x, -1/2+y, 1.5-z  |

---

|           |                |       |      |          |     |                    |
|-----------|----------------|-------|------|----------|-----|--------------------|
|           | O13-H13D···N11 | 0.87  | 2.17 | 3.03(1)  | 173 |                    |
|           | O14-H14A···O6  | 0.87  | 1.95 | 2.801(5) | 167 |                    |
| <b>S2</b> | N2-H2···O1     | 0.88  | 1.90 | 2.762(5) | 167 |                    |
|           | N5-H5A···O7    | 0.88  | 2.03 | 2.844(5) | 153 |                    |
|           | O16-H16B···O6  | 0.85  | 2.01 | 2.857(5) | 174 |                    |
|           | O17-H17D···O16 | 0.86  | 1.91 | 2.768(7) | 172 | 1/2+x, 1.5-y, 1-z  |
|           | O17-H17C···O14 | 0.86  | 2.22 | 2.992(7) | 150 |                    |
|           | O16-H16A···O3  | 0.85  | 1.88 | 2.732(5) | 177 |                    |
|           | N7-H7···O3     | 0.88  | 1.97 | 2.770(5) | 151 |                    |
|           | N1-H1···O4     | 0.88  | 1.89 | 2.749(5) | 165 |                    |
|           | N6-H6···O10    | 0.88  | 2.06 | 2.900(5) | 159 |                    |
|           | N3-H3···O9     | 0.88  | 1.83 | 2.699(5) | 170 |                    |
| <b>S3</b> | N1-H1···O1     | 0.88  | 1.99 | 2.776(4) | 148 |                    |
|           | N5-H5···O7     | 0.88  | 1.88 | 2.751(4) | 172 |                    |
|           | N2-H2···O3     | 0.88  | 1.97 | 2.788(4) | 153 | -1+x, y, z         |
|           | N3-H3···O10    | 0.88  | 1.96 | 2.706(4) | 142 |                    |
|           | N6-H6A···O10   | 0.851 | 1.93 | 2.784(4) | 163 | 1/2-x, 1-y, -1/2+z |
|           | N7-H7···O4     | 0.88  | 1.83 | 2.684(4) | 164 |                    |
|           | O15-H15B···O6  | 0.86  | 2.08 | 2.921(7) | 169 |                    |
|           | O15-H15A···O7  | 0.85  | 2.09 | 2.855(6) | 150 |                    |
|           | O14-H14A···O15 | 0.85  | 2.30 | 2.839(9) | 121 |                    |
|           | O13-H13···O9   | 0.84  | 1.94 | 2.774(5) | 170 |                    |

---

|           |               |      |      |          |     |              |
|-----------|---------------|------|------|----------|-----|--------------|
| <b>S4</b> | O14-H14...O3  | 0.84 | 1.96 | 2.79(2)  | 170 |              |
|           | O15-H15...O6  | 0.84 | 2.63 | 2.96(2)  | 105 |              |
|           | O13-H13...O10 | 0.84 | 1.96 | 2.792(9) | 171 |              |
|           | N5-H5A...O4   | 0.88 | 2.00 | 2.778(8) | 146 |              |
|           | N7-H7...O3    | 0.88 | 1.92 | 2.781(9) | 168 |              |
|           | N2-H2...O9    | 0.88 | 2.05 | 2.851(7) | 151 | x, 1+ y, z   |
|           | N3-H3...O9    | 0.88 | 1.94 | 2.798(9) | 165 | -y, x, 1/4+z |

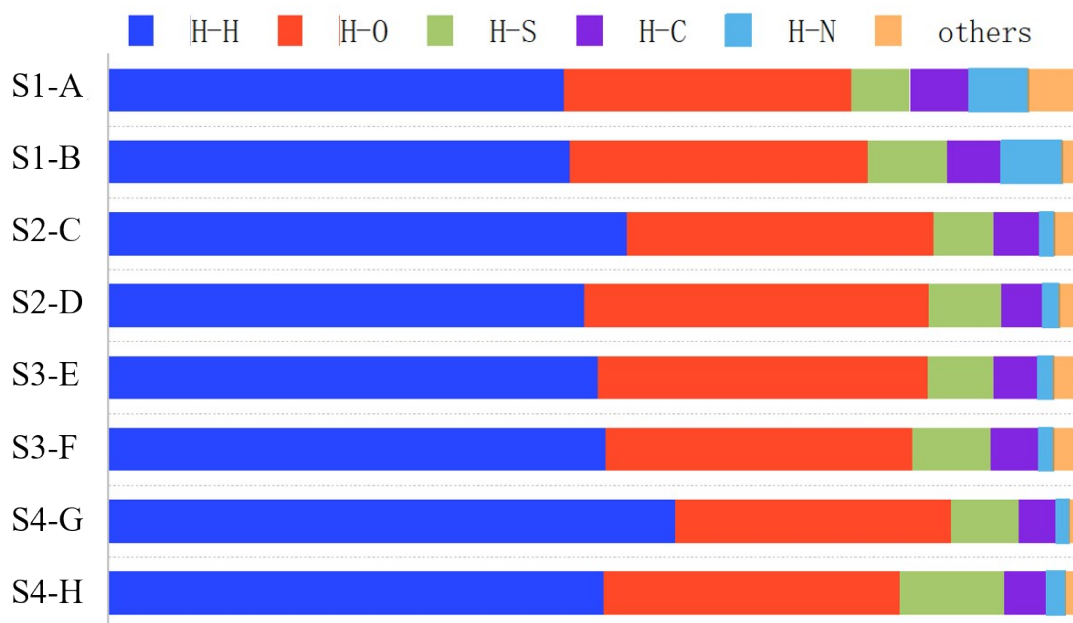

Fig. S4 The relative contributions of different interactions to the Hirshfeld surface.

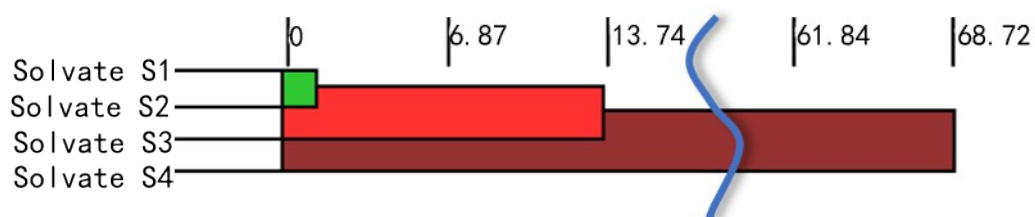

Fig. S5 The packing similarity tree diagram of the cefathiamidine solvates calculated using CrystalCMP. A part of the diagram between 13.74 and 61.84 was deleted to make the figure shorter and more readable which is indicated by blue curved line.

Table S4 Thermal analysis results

| solvate                             | ratio     | calculated     | measured     | Guest              | Resulting         | Total           |
|-------------------------------------|-----------|----------------|--------------|--------------------|-------------------|-----------------|
|                                     |           | weight loss, % | mass loss, % | loss $T_{on}$ (°C) | phase via heating | Energy (kJ/mol) |
| Acetonitrile solvate monohydrate S1 | 1:1.5: 1  | 14.4           | 14.6         | 30                 | Form I            | 1289.3          |
| Acetone solvate monohydrate S2      | 1:1.5: 1  | 18.1           | 18.2         | 30                 | Form II           | 1249.8          |
| N-propanol solvate 1.5 hydrate S3   | 1:0.5:1.5 | 10.8           | 10.5         | 48                 | Form I            | 1144.4          |
| Isopropanol solvate S4              | 1:1       | 11.3           | 11.2         | 30                 | Amorphous         | 1502.5          |

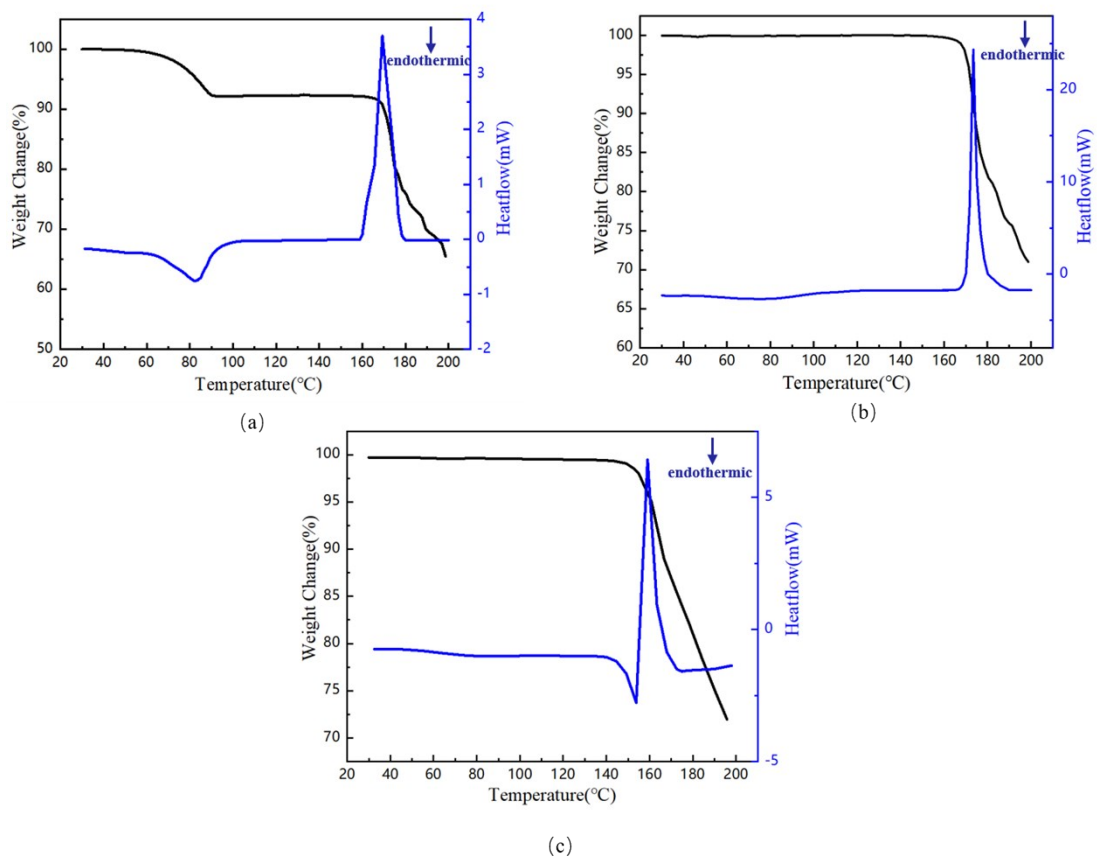

Figure S6. Thermogravimetric analysis (TGA) and differential scanning calorimetry (DSC) curves of cefathiamidine (a) solvate III, (b) form I and (c) form II.
